# Supplementary material for: Road Transport of Farm Animals: Mortality, Morbidity, Species and Country of Origin at a Southern Italian Control Post
Source: MDPI journal article supplement (doi:10.3390/ani8090155), 2018-09-17
Supplement: s1 [file s1]

**Figure S1.** Trends of the number of trucks by year and species and by month and species.

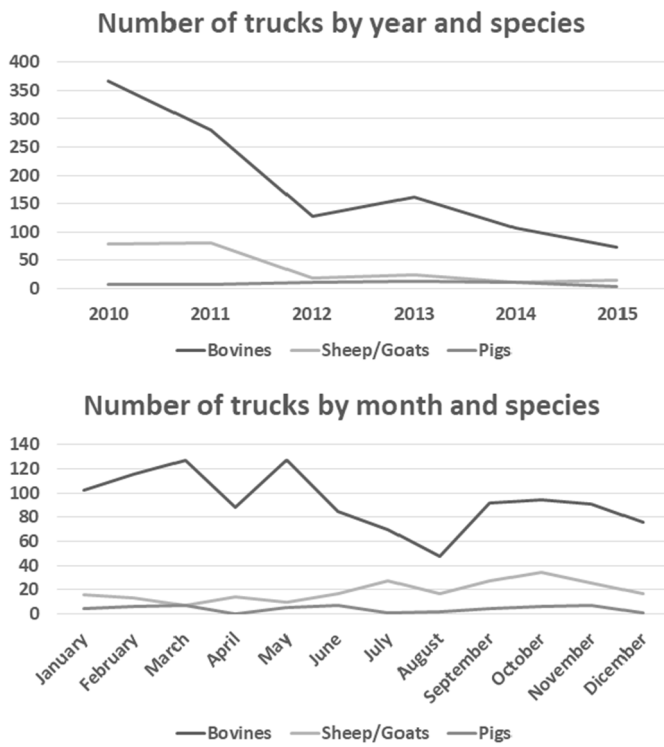

**Figure S2.** Association between species and nationality of Transport Company and destination.

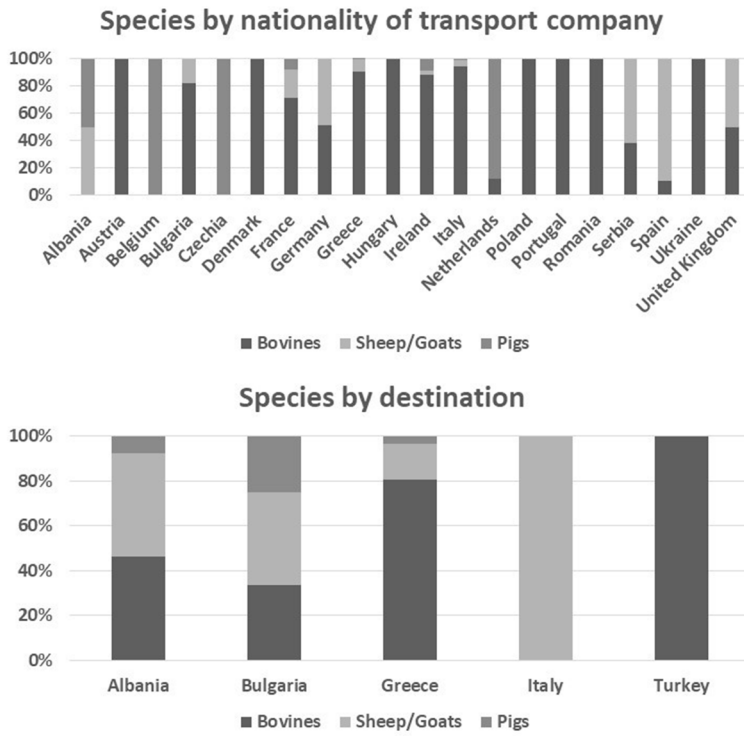

**Table S1:** Wald test P-values generated from univariate regression analysis

| <b>Predictive Variable</b> | <b>Welfare problem</b> |
|----------------------------|------------------------|
| Year                       | 0.571                  |
| Month                      | 0.998                  |
| Season                     | 0.893                  |
| Species                    | 0.049                  |
| Category                   | 0.527                  |
| Provenance                 | 1.000                  |
| Destination                | 0.078                  |
| Nationality                | 0.999                  |
| Space allowance            | 0.003                  |

**Table S2.** Results of the GLM with year, month, season, species and category as factors and number of animals transported per truck (NATT) as dependent variables. Results expressed as Least Square means  $\pm$  standard error.

| <b>Independent Variable</b> | <b>NATT</b>                       |
|-----------------------------|-----------------------------------|
| <b>P of Year</b>            | 0.072                             |
| 2010                        | 75.29 $\pm$ 4.23                  |
| 2011                        | 81.98 $\pm$ 4.69                  |
| 2012                        | 77.89 $\pm$ 7.20                  |
| 2013                        | 83.38 $\pm$ 6.41                  |
| 2014                        | 72.01 $\pm$ 7.99                  |
| 2015                        | 105.59 $\pm$ 9.43                 |
| <b>P of Month</b>           | <b>&lt;0.0001</b>                 |
| January                     | 68.35 $\pm$ 8.06 <sup>bc</sup>    |
| February                    | 64.33 $\pm$ 7.67 <sup>bc</sup>    |
| March                       | 57.20 $\pm$ 7.50 <sup>c</sup>     |
| April                       | 80.78 $\pm$ 8.82 <sup>abd</sup>   |
| May                         | 57.78 $\pm$ 7.47 <sup>c</sup>     |
| June                        | 86.43 $\pm$ 8.53 <sup>abd</sup>   |
| July                        | 102.17 $\pm$ 8.99 <sup>d</sup>    |
| August                      | 98.48 $\pm$ 10.88 <sup>ad</sup>   |
| September                   | 89.76 $\pm$ 8.03 <sup>d</sup>     |
| October                     | 102.80 $\pm$ 7.70 <sup>d</sup>    |
| November                    | 92.04 $\pm$ 7.99 <sup>d</sup>     |
| December                    | 82.36 $\pm$ 9.19 <sup>abd</sup>   |
| <b>P of Season</b>          | <b>&lt;0.0001</b>                 |
| Winter                      | 65.26 $\pm$ 4.74 <sup>a</sup>     |
| Spring                      | 70.59 $\pm$ 4.64 <sup>a</sup>     |
| Summer                      | 96.38 $\pm$ 5.37 <sup>b</sup>     |
| Autumn                      | 91.40 $\pm$ 4.53 <sup>b</sup>     |
| <b>P of Species</b>         | <b>&lt;0.0001</b>                 |
| Pigs                        | 106.66 $\pm$ 4.75 <sup>ab</sup>   |
| Sheep/goats                 | 268.68 $\pm$ 2.24 <sup>a</sup>    |
| Bovines                     | 40.99 $\pm$ 1 <sup>b</sup>        |
| <b>P of Category</b>        | <b>&lt;0.0001</b>                 |
| Sheep/goats                 | 242.41 $\pm$ 2.07 <sup>acdf</sup> |
| Lambs                       | 334.78 $\pm$ 3.29 <sup>c</sup>    |
| Medium size calves          | 67.48 $\pm$ 2.26 <sup>d</sup>     |
| Heavy calves                | 55.37 $\pm$ 2.05 <sup>ac</sup>    |
| Medium size cattle          | 43.62 $\pm$ 2.69 <sup>e</sup>     |
| Heavy cattle                | 32.50 $\pm$ 0.99 <sup>b</sup>     |
| Very heavy cattle           | 21.72 $\pm$ 7.94 <sup>f</sup>     |
| Light fattening             | 118.95 $\pm$ 4.16 <sup>a</sup>    |
| Heavy fattening             | 70.00 $\pm$ 11.77 <sup>g</sup>    |
| Breeding                    | 45.00 $\pm$ 11.77 <sup>d</sup>    |
| <b>P of Provenance</b>      | <b>&lt;0.0001</b>                 |
| Austria                     | 33.00 $\pm$ 41.22 <sup>ac</sup>   |
| Belgium                     | 86.00 $\pm$ 35.70 <sup>ac</sup>   |
| Denmark                     | 20.00 $\pm$ 71.40 <sup>ac</sup>   |
| France                      | 58.65 $\pm$ 2.26 <sup>a</sup>     |
| Germany                     | 32.57 $\pm$ 26.98 <sup>ac</sup>   |

|                                         |                               |
|-----------------------------------------|-------------------------------|
| Hungary                                 | 80.00 ± 71.40 <sup>abc</sup>  |
| Ireland                                 | 67.32 ± 7.03 <sup>a</sup>     |
| Italy                                   | 37.44 ± 8.72 <sup>c</sup>     |
| Luxembourg                              | 33.00 ± 50.49 <sup>a</sup>    |
| Netherlands                             | 32.85 ± 26.98 <sup>ac</sup>   |
| Portugal                                | 75.00 ± 31.93 <sup>ac</sup>   |
| Romania                                 | 38.00 ± 71.40 <sup>a</sup>    |
| Spain                                   | 216.78 ± 5.11 <sup>b</sup>    |
| United Kingdom                          | 52.33 ± 41.22 <sup>a</sup>    |
| <b>P of Destination</b>                 | <b>&lt;0.0001</b>             |
| Albania                                 | 114.23 ± 24.78 <sup>ad</sup>  |
| Bulgaria                                | 188.33 ± 25.79 <sup>b</sup>   |
| Greece                                  | 79.19 ± 2.45 <sup>ac</sup>    |
| Italy                                   | 203.00 ± 44.6 <sup>bd</sup>   |
| Turkey                                  | 53.85 ± 15.10 <sup>c</sup>    |
| <b>Nationality of transport company</b> | <b>&lt;0.001</b>              |
| Albania                                 | 94.50 ± 54.66 <sup>abcd</sup> |
| Austria                                 | 30.50 ± 54.66 <sup>ac</sup>   |
| Belgium                                 | 69.80 ± 34.57 <sup>ac</sup>   |
| Bulgaria                                | 90.53 ± 8.10 <sup>a</sup>     |
| Czechia                                 | 147.00 ± 77.30 <sup>b</sup>   |
| Denmark                                 | 33.00 ± 54.66 <sup>ac</sup>   |
| France                                  | 100.77 ± 6.97 <sup>a</sup>    |
| Germany                                 | 169.92 ± 12.38 <sup>b</sup>   |
| Greece                                  | 60.15 ± 3.10 <sup>c</sup>     |
| Hungary                                 | 45.06 ± 13.75 <sup>c</sup>    |
| Ireland                                 | 66.64 ± 7.58 <sup>c</sup>     |
| Italy                                   | 79.15 ± 6.80 <sup>c</sup>     |
| Netherlands                             | 86.76 ± 15.46 <sup>ac</sup>   |
| Poland                                  | 42.25 ± 11.27 <sup>c</sup>    |
| Portugal                                | 75.00 ± 34.57 <sup>ac</sup>   |
| Romania                                 | 18.00 ± 44.63 <sup>ac</sup>   |
| Serbia                                  | 169.47 ± 10.23 <sup>b</sup>   |
| Spain                                   | 238.40 ± 9.44 <sup>d</sup>    |
| Ukraine                                 | 32.03 ± 13.47 <sup>c</sup>    |
| United Kingdom                          | 30.00 ± 54.66 <sup>ac</sup>   |

**Legend.** In the same column, means with different superscripts differ significantly (a, b, c, d, e, f P<0.05).
